# Supplementary material for: ZnO nanorods modified with noble metal-free Co3O4 nanoparticles as a photocatalyst for efficient ethylene degradation under light irradiation
Source: Royal Society of Chemistry journal article supplement (doi:10.1039/c9cy01732a), 2019-01-01
Supplement: c9cy01732a1.pdf [file c9cy01732a1.pdf]

## Supporting Information

### **ZnO nanorod modified with noble metal-free Co<sub>3</sub>O<sub>4</sub> nanoparticles as a photocatalyst for the efficient ethylene-degradation under light irradiation**

Zihao Cui,<sup>a</sup> Xiaolei Liu,<sup>a</sup> Xizhuang Liang,<sup>a</sup> Peng Wang,<sup>\*,a</sup> Qianqian Zhang,<sup>a</sup> Zeyan Wang,<sup>a</sup> Zhaoke Zheng,<sup>a</sup> Yuanyuan Liu,<sup>a</sup> Ying Dai,<sup>b</sup> and Baibiao Huang<sup>a</sup>

<sup>a</sup> State Key Laboratory of Crystal Materials, Shandong University, Jinan 250100, China

<sup>b</sup> School of Physics, Shandong University, Jinan 250100, China

\*Corresponding authors e-mail addresses:

pengwangicm@sdu.edu.cn (P. Wang).

1. Pure  $\text{RuO}_2$  and  $\text{Co}_3\text{O}_4$  were also prepared in the same method, except that no  $\text{ZnO}$  was added to the solution before the chemical deposition reaction. The XRD patterns of the pure  $\text{Co}_3\text{O}_4$  and  $\text{RuO}_2$  samples with  $300^\circ\text{C}$  are shown in **Fig. S1**.

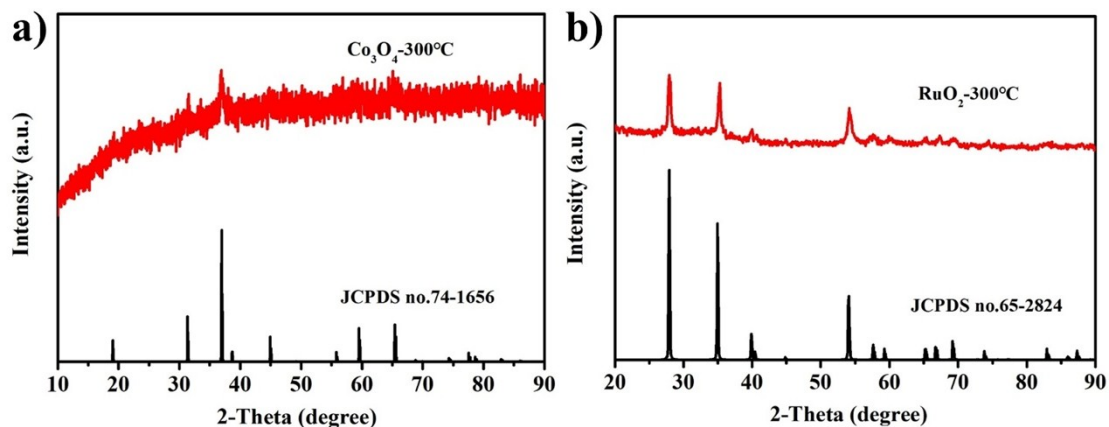

**Fig. S1.** The XRD patterns of the pure (a)  $\text{Co}_3\text{O}_4$  and (b)  $\text{RuO}_2$  samples with  $300^\circ\text{C}$ .

2. The XRD patterns of the pure  $\text{ZnO}$  and  $\text{ZnO}/\text{Co}_3\text{O}_4$  samples annealed at different temperatures.

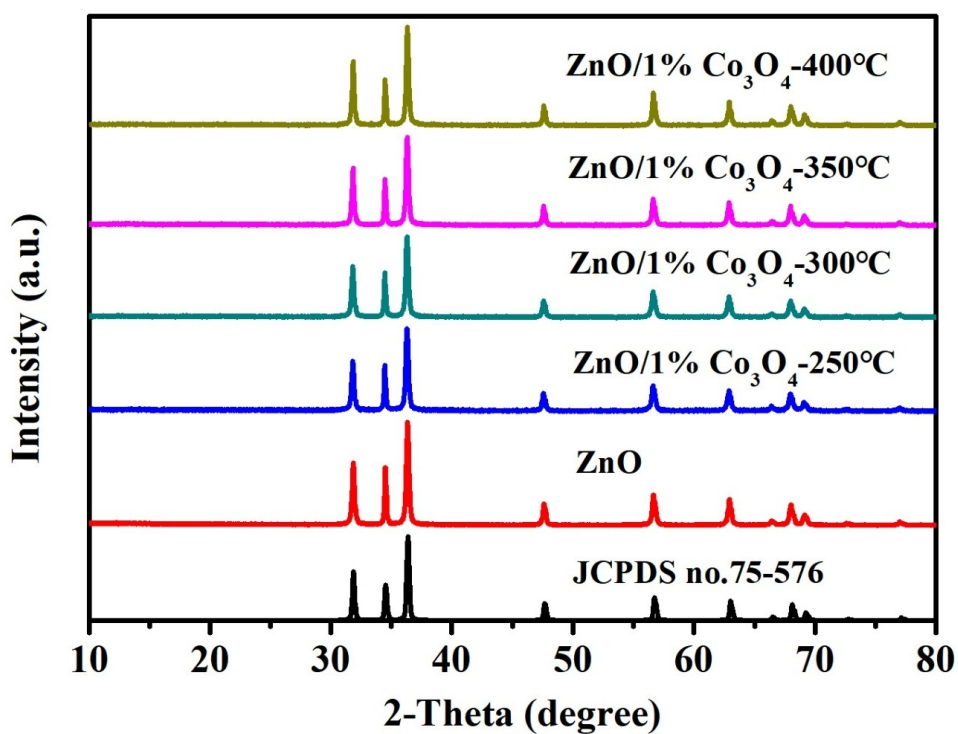

**Fig. S2.** The XRD patterns of the pure ZnO and Co<sub>3</sub>O<sub>4</sub> nanoparticles decorated on ZnO samples annealed at different temperatures.

3. The EDS spectra of the ZnO/1% Co<sub>3</sub>O<sub>4</sub>-300 °C sample.

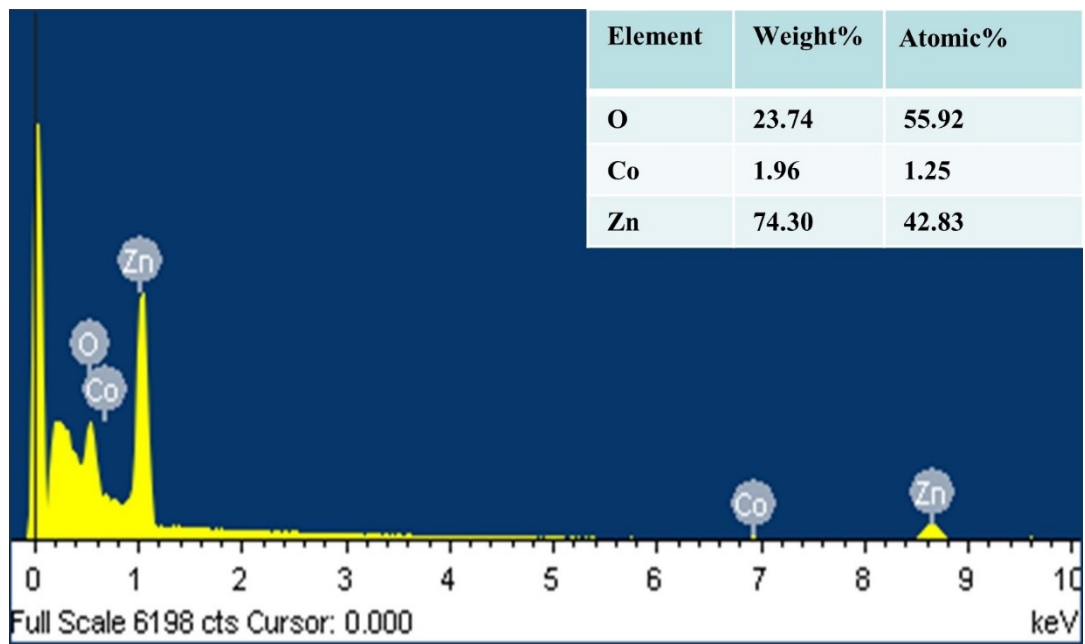

**Fig. S3.** The EDS spectra of the ZnO/1% Co<sub>3</sub>O<sub>4</sub>-300 °C sample.

4. The  $(Ah\nu)^2-h\nu$  plots of ZnO, ZnO/0.5% RuO<sub>2</sub>-300 °C and ZnO/1% Co<sub>3</sub>O<sub>4</sub>-300 °C.

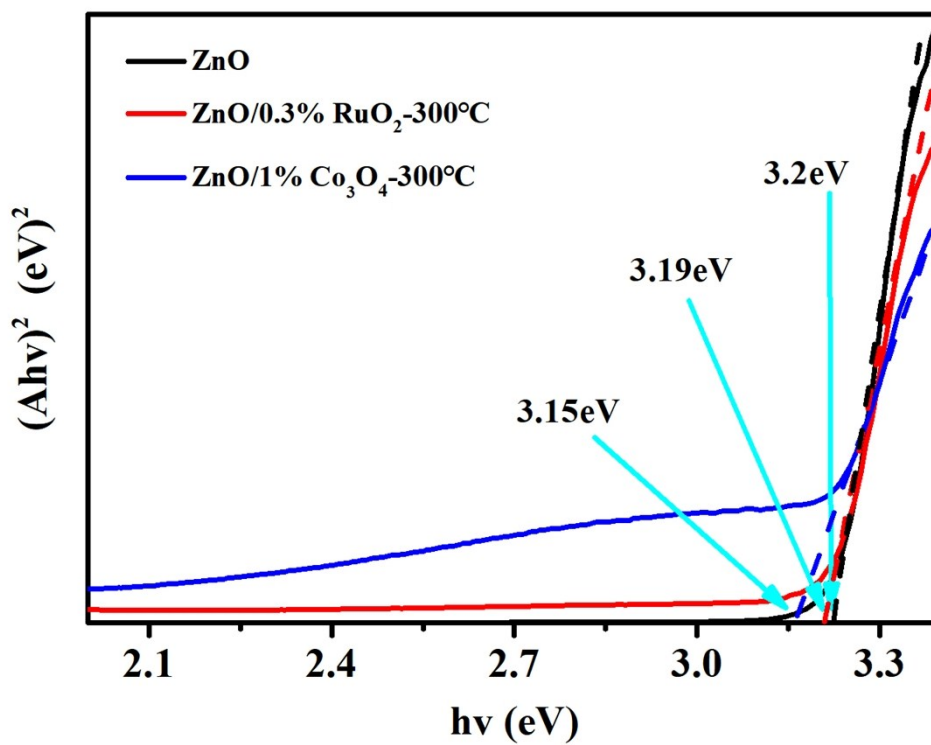

**Fig. S4.** The  $(Ah\nu)^2$ - $h\nu$  plots of ZnO, ZnO/0.5%  $\text{RuO}_2$ -300 °C and ZnO/1%  $\text{Co}_3\text{O}_4$ -300 °C.

5. UV-vis diffuse reflectance spectra of ZnO/ $\text{Co}_3\text{O}_4$  and ZnO/ $\text{RuO}_2$ .

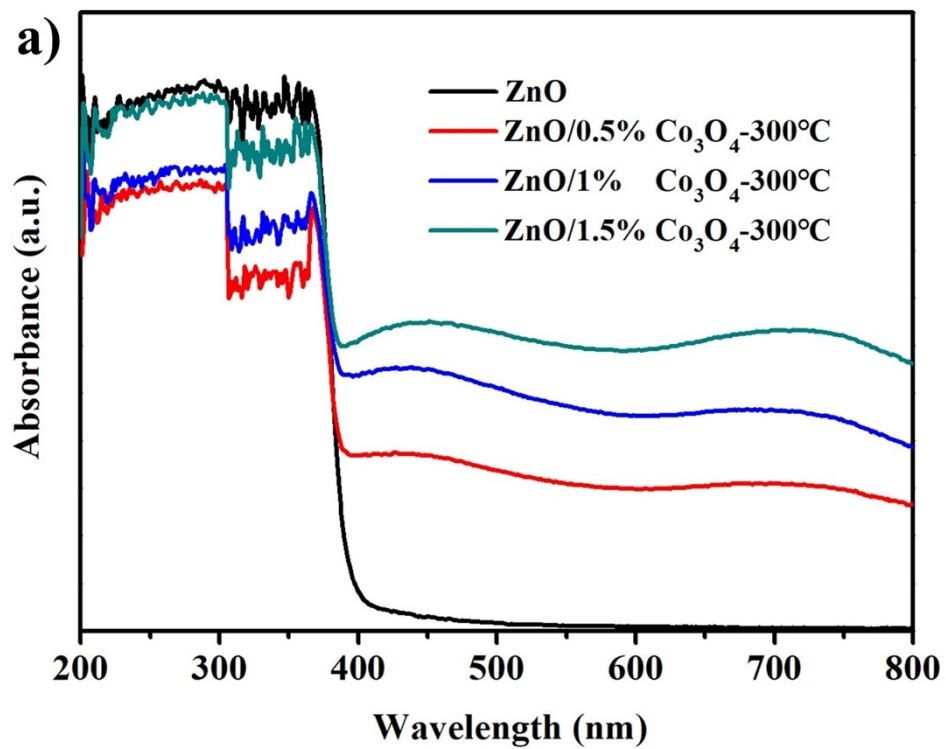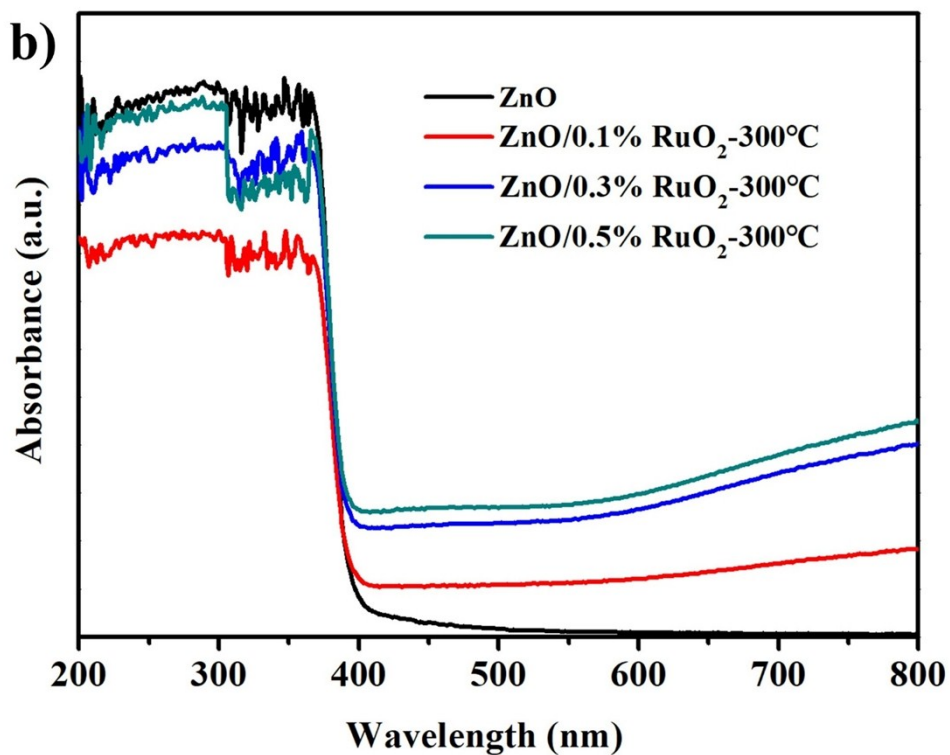

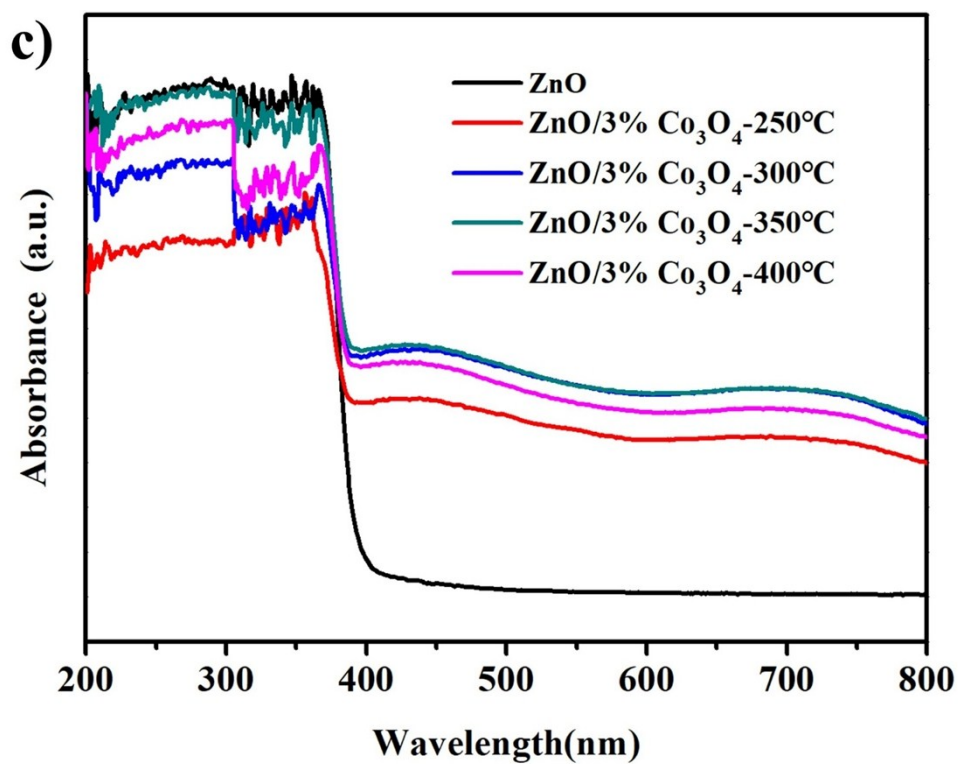

**Fig. S5.** UV-vis diffuse reflectance spectra of ZnO/Co<sub>3</sub>O<sub>4</sub> (a) and ZnO/RuO<sub>2</sub> (b) samples with different molar ratios. (c) UV-vis diffuse reflectance spectra of ZnO/Co<sub>3</sub>O<sub>4</sub> annealed at different temperatures.

6. Photocatalytic degradation of ethylene by using ZnO/Co<sub>3</sub>O<sub>4</sub> annealed at different temperatures.

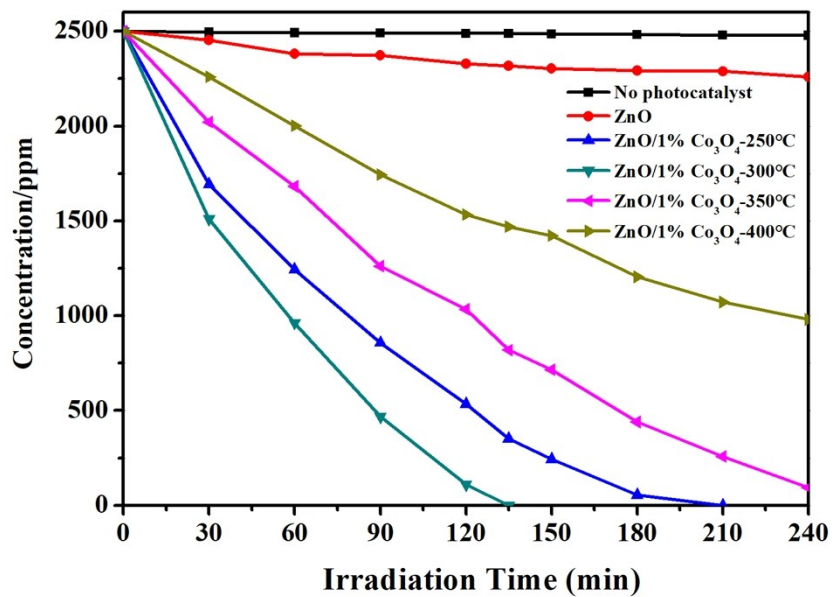

**Fig. S6.** Photocatalytic degradation of ethylene by using ZnO/Co<sub>3</sub>O<sub>4</sub> annealed at different temperatures.

7. The XRD patterns of ZnO/1% Co<sub>3</sub>O<sub>4</sub>-300 °C samples before and after photocatalytic degradation of ethylene.

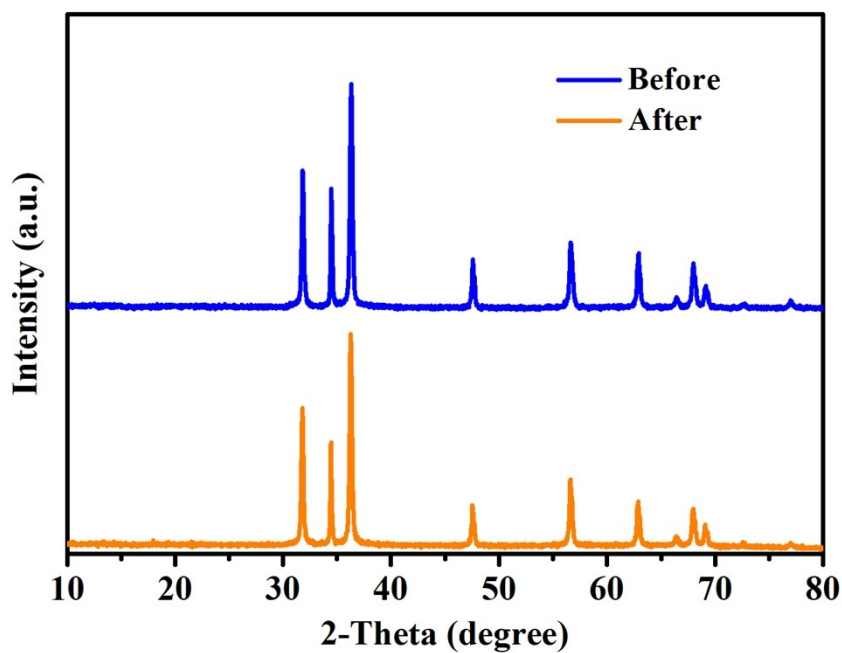

**Fig. S7.** The XRD patterns of ZnO/1% Co<sub>3</sub>O<sub>4</sub>-300 °C samples before and after photocatalytic degradation of ethylene.

**Table S1.** The comparison of photocatalytic C<sub>2</sub>H<sub>4</sub> degradation activities of different photocatalysts.

| Photocatalyst                                                      | C <sub>2</sub> H <sub>4</sub> (ppm) | Amount (g) | Light source                             | Performance                                                                              | Reference        |
|--------------------------------------------------------------------|-------------------------------------|------------|------------------------------------------|------------------------------------------------------------------------------------------|------------------|
| ZnO/1mol% Co <sub>3</sub> O <sub>4</sub>                           | 2500                                | 0.15       | 300W Xe lamp full spectrum irradiation   | After 135 min light irradiation, C <sub>2</sub> H <sub>4</sub> can be degrade completely | <b>This work</b> |
| ZnO/0.3mol% RuO <sub>2</sub>                                       | 2500                                | 0.15       | 300W Xe lamp full spectrum irradiation   | After 210 min light irradiation, C <sub>2</sub> H <sub>4</sub> can be degrade completely | <b>This work</b> |
| ZnO/1.5wt% Ag                                                      | 2500                                | 0.5        | 300W Xe lamp full spectrum irradiation   | After 150 min light irradiation, C <sub>2</sub> H <sub>4</sub> can be degrade completely | [1]              |
| ZnO/CeO <sub>2</sub> -1.0%Ag                                       | 1250                                | 0.5        | 300W Xe lamp full spectrum irradiation   | After 90 min light irradiation, C <sub>2</sub> H <sub>4</sub> can be degrade completely  | [2]              |
| ZnO/CeO <sub>2</sub> -1.5%Au                                       | 1250                                | 0.5        | 300W Xe lamp full spectrum irradiation   | After 120 min light irradiation, C <sub>2</sub> H <sub>4</sub> can be degrade completely | [2]              |
| 0.75 wt% Pt@0.25 mol% Fe-WO <sub>3</sub>                           | 1250                                | 0.4        | 300 W Xe lamp (visible light, λ>420 nm)  | After 210 min light irradiation, C <sub>2</sub> H <sub>4</sub> can be degrade completely | [3]              |
| In <sub>2</sub> O <sub>3</sub> -Ag-Ag <sub>3</sub> PO <sub>4</sub> | 200                                 | 0.2        | 300 W Xe lamp (visible light, λ>420 nm)  | After 2 h light irradiation, C <sub>2</sub> H <sub>4</sub> can be degrade completely     | [4]              |
| Pt-TiO <sub>2</sub> nanosheets                                     | 200                                 | 0.1        | 300 W Xe lamp (visible light, λ> 420 nm) | After 12 min light irradiation, C <sub>2</sub> H <sub>4</sub> can be degrade completely  | [5]              |



|                                |      |     |                                                       |                                                                                   |     |
|--------------------------------|------|-----|-------------------------------------------------------|-----------------------------------------------------------------------------------|-----|
| BiVO <sub>4</sub> (040) facets | 100  | 0.5 | Schölly Fiberoptic Flexilux 650 Kaltlichtquelle 150 W | After 150 light irradiation, 60% C <sub>2</sub> H <sub>4</sub> is degraded        | [6] |
| BiVO <sub>4</sub> /P25         | 1500 | 1   | 500 W Xe lamp (visible light, $\lambda > 400$ nm)     | After 6 h light irradiation, only 7.56% C <sub>2</sub> H <sub>4</sub> is degraded | [7] |

## References

- [1] X. L. Zhu, X. Z. Liang, P. Wang, Y. Dai, B. B. Huang, *Appl. Surf. Sci.* 456 (2018) 493-500.
- [2] X. Liang, P. Wang, Y. Gao, H. Huang, F. Tong, Q. Zhang, Z. Wang, Y. Liu, Z. Zheng, Y. Dai and B. Huang, *Appl. Catal. B: Environ.*, 2020, **260**, 118151.
- [3] X. L. Liu, H.S. Zhai, P. Wang, B.B. Huang, *Catal. Sci. Technol.* 9 (2019) 652-658
- [4] X. X. Chen, R. Li, X. Y. Pan, X. T. Huang, Z. G. Yi, *Chem. Eng. J.* 320 (2017) 644-652.
- [5] X. Y. Pan, X. X. Chen, Z. G. Yi, *ACS Appl. Mater. Interfaces*, 8 (2016) 10104-10108.
- [6] S.M. Thalluri, M. Hussain, G. Saracco, J. Barber, N. Russo, *Ind. Eng. Chem. Res.* 53 (2014) 2640-2646.
- [7] X. L. Song, Y. Y. Li, Z. D. Wei, S. Y. Ye, D. D. Dionysiou, *Chem. Eng. J.* 314 (2017) 443-452.
